# Supplementary material for: A large-scale analysis of bioinformatics code on GitHub
Source: PLoS One. 2018 Oct 31;13(10):e0205898. doi: 10.1371/journal.pone.0205898 (PMC6209220; doi:10.1371/journal.pone.0205898)
Supplement: S1 Table — (XLSX) [file pone.0205898.s002.xlsx]

## Sheet: Bioinformatics topics
Topic	Source	Description
Analysis of cellular organization	WI	Several approaches have been developed to analyze the location of organelles, genes, proteins, and other components within cells. This is relevant as the location of these components affects the events within a cell and thus helps us to predict the behavior of biological systems. A gene ontology category, cellular compartment, has been devised to capture subcellular localization in many biologica…
Biodiversity informatics	WI	Biodiversity informatics deals with the collection and analysis of biodiversity data, such as taxonomic databases, or microbiome data. Examples of such analyses include phylogenetics, niche modelling, species richness mapping, DNA barcoding, or species identification tools.
Bioimage informatics	JS	This category includes novel methods for the acquisition, analysis and modeling of images produced by modern microscopy, with an emphasis on the application of innovative computational methods to solve challenging and significant biological problems at the molecular, sub-cellular, cellular, and tissue levels. This category also encourages large-scale image informatics methods/applications/softwar…
Computational evolutionary biology	WI	Evolutionary biology is the study of the origin and descent of species, as well as their change over time. Informatics has assisted evolutionary biologists by enabling researchers to: trace the evolution of a large number of organisms by measuring changes in their DNA, rather than through physical taxonomy or physiological observations alone, more recently, compare entire genomes, which permits t…
Data and text mining	JS	This category includes: New methods and tools for extracting biological information from text, databases and other sources of information. Description of tools to organize, distribute and represent this information. New methods for inferring and predicting biological features based on the extracted information.
Databases and ontologies	JS	This category includes: Curated biological databases, data warehouses, eScience, web services, database integration, biologically-relevant ontologies.
Gene expression	JS	This category includes a wide range of applications relevant to the high-throughput analysis of expression of biological quantities, including microarrays (nucleic acid, protein, array CGH, genome tiling, and other arrays), RNA-seq, proteomics and mass spectrometry. Approaches to data analysis to be considered include statistical analysis of differential gene expression; expression-based classifi…
Genetics and population analysis	JS	This category includes: Segregation analysis, linkage analysis, association analysis, map construction, population simulation, haplotyping, linkage disequilibrium, pedigree drawing, marker discovery, power calculation, genotype calling.
Genome analysis	JS	This category includes: Comparative genomics, genome assembly, genome and chromosome annotation, identification of genomic features such as genes, splice sites and promoters.
Phylogenetics	JS	This category includes: novel phylogeny estimation procedures for molecular data including nucleotide sequence data, amino acid data, whole genomes, SNPs, etc., simultaneous multiple sequence alignment and phylogeny estimation, phylogenetic approaches for any aspect of molecular sequence analysis (see Sequence Analysis scope), models of molecular evolution, assessments of statistical support of r…
Pipelines, wrappers, extensions, and utilities	PR	Pipelines, wrappers, or extensions incorporating tools that meet other criteria in this definition. Software utilities whose primary purpose is to aid in workflows that meet other criteria in this definition.
Sequence analysis	JS	This category includes: Multiple sequence alignment, sequence searches and clustering; prediction of function and localisation; novel domains and motifs; prediction of protein, RNA and DNA functional sites and other sequence features.
Structural bioinformatics	JS	This category includes: New methods and tools for structure prediction, analysis and comparison; new methods and tools for model validation and assessment; new methods and tools for docking; models of proteins of biomedical interest; protein design; structure based function prediction.
Systems biology	JS	This category includes whole cell approaches to molecular biology. Any combination of experimentally collected whole cell systems, pathways or signaling cascades on RNA, proteins, genomes or metabolites that advances the understanding of molecular biology or molecular medicine will be considered. Interactions and binding within or between any of the categories will be considered including protein…

## Sheet: Source codes
Source	Code	Date	URL
Bioinformatics journal scope	JS	2017-06-25	https://academic.oup.com/bioinformatics/pages/scope_guidelines
Pamela Russell added	PR	2017-07-14
Wikipedia article on Bioinformatics	WI	2017-06-25	https://en.wikipedia.org/w/index.php?title=Bioinformatics&oldid=784735926
